# Supplementary material for: Catalytic oxidation of propane over palladium alloyed with gold: an assessment of the chemical and intermediate species
Source: Royal Society of Chemistry journal article supplement (doi:10.1039/c8cy01704b), 2018-01-01
Supplement: c8cy01704b1.pdf [file c8cy01704b1.pdf]

## Supporting Information

### Catalytic Oxidation of Propane over Palladium Alloyed with Gold: An Assessment of the Chemical and Intermediate Species

Haval Kareem,<sup>a</sup> Shiyao Shan,<sup>a</sup> Zhi-Peng Wu,<sup>a</sup> Leslie Velasco,<sup>a</sup> Kelli Moseman,<sup>a</sup> Casey P. O'Brien,<sup>c</sup> Ivan c. Lee,<sup>c\*</sup> Dat T. Tran,<sup>c</sup> Yazan Maswadeh,<sup>b</sup> Lefu Yang,<sup>d</sup> Derrick Mott,<sup>e</sup> Jin Luo,<sup>a</sup> Valeri Petkov,<sup>b\*</sup> and Chuan-Jian Zhong<sup>a,\*</sup>

<sup>a</sup>) Department of Chemistry, State University of New York at Binghamton, Binghamton, NY 13902, USA

<sup>b</sup>) Department of Physics, Central Michigan University, Mt. Pleasant, Michigan 48859, USA

<sup>c</sup>) U.S. Army Research Laboratory, Sensors and Electron Devices Directorate, Adelphi, MD 20783, USA

<sup>d</sup>) College of Chemistry and Chemical Engineering, Xiamen University, Xiamen 361005, China

<sup>e</sup>) School of Materials Science, Japan Advanced Institute of Science and Technology, Nomi, Ishikawa 923-1292, Japan

#### Additional HAADF-STEM image, characterization, and catalytic activity data:

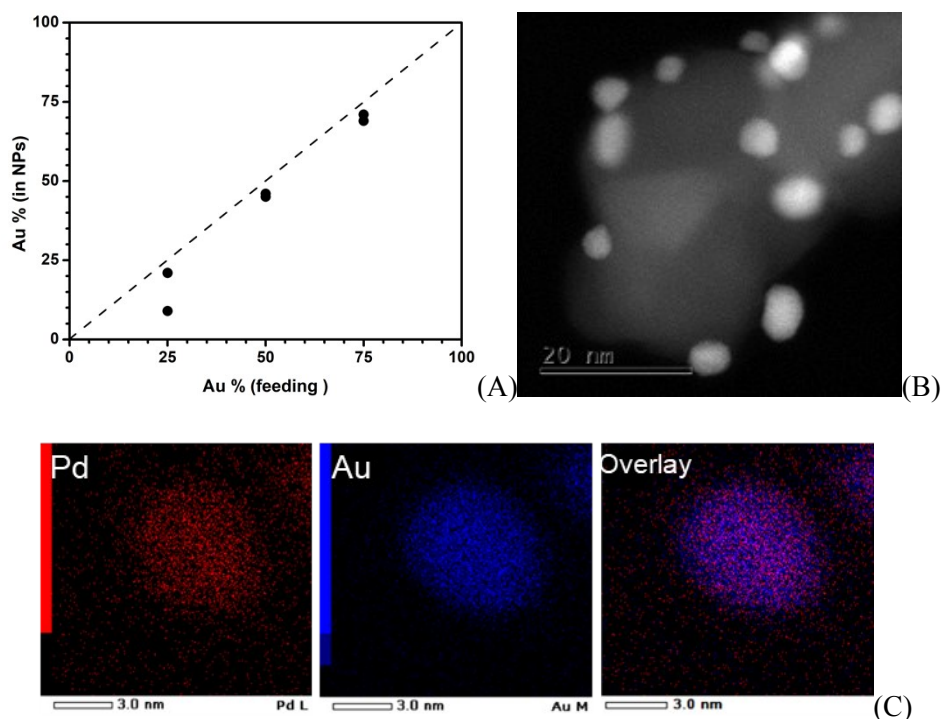

**Fig. S1.** (A) Plot of Au composition in the as-synthesized PdAu nanoparticles (determined by ICP) vs. Au-precursor composition in the synthetic feeding composition. The dashed line represents a 1:1 relationship. The solid line represents the linear fitting to the NPs data (slope: 1.2, R<sup>2</sup> = 0.974). (B) HAADF-STEM images for Pd<sub>55</sub>Au<sub>45</sub>/TiO<sub>2</sub> nanoparticles. (C) EDS mapping of Pd and Au in a representative sample of Pd<sub>55</sub>Au<sub>45</sub>/TiO<sub>2</sub>.

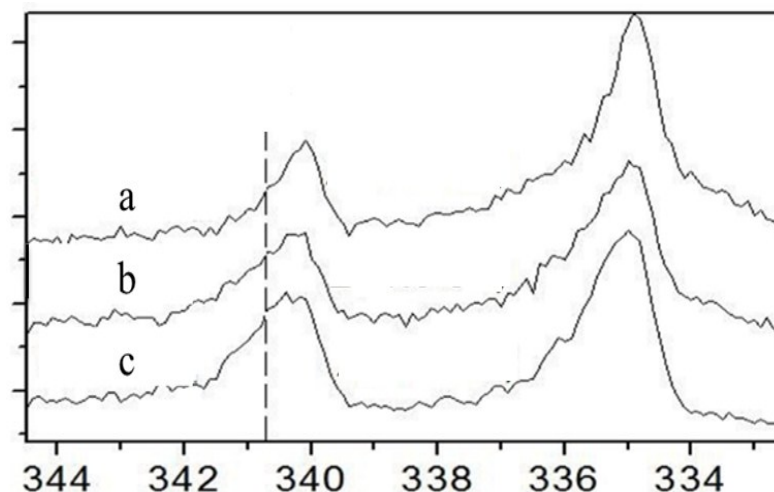

**Fig.S2.** XPS spectra in the Pd(3d) region for Pd<sub>31</sub>Au<sub>69</sub> (a), Pd<sub>55</sub>Au<sub>45</sub> (b), and Pd<sub>91</sub>Au<sub>9</sub> (c). The dashed line is for comparison of the relative shifts of the peak positions of Pd 3d<sub>3/2</sub> and 3d<sub>5/2</sub> (~340.2 eV and ~335 eV). There is a downshift for Pd 3d<sub>3/2</sub> (0.5 eV (a), 0.3 eV (b), and 0.4 eV (c)). This peak position is largely characteristic of Pd(0) state, which is supported by the fact that no oxygen species (at 343 eV) were detected<sup>26</sup>. The subtle shifts are a result of charge transfer from Au to Pd (*d*-electron) in the AuPd alloys.

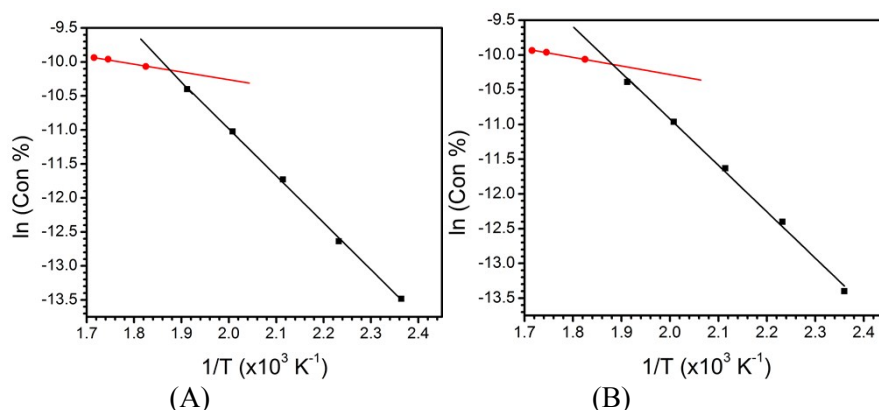

**Fig.S3** Arrhenius plot For Pd<sub>55</sub>Au<sub>45</sub>/TiO<sub>2</sub> for propane oxidation as fresh state (A), and O<sub>2</sub> treated (B), low temperature (black) and high temperature (red)

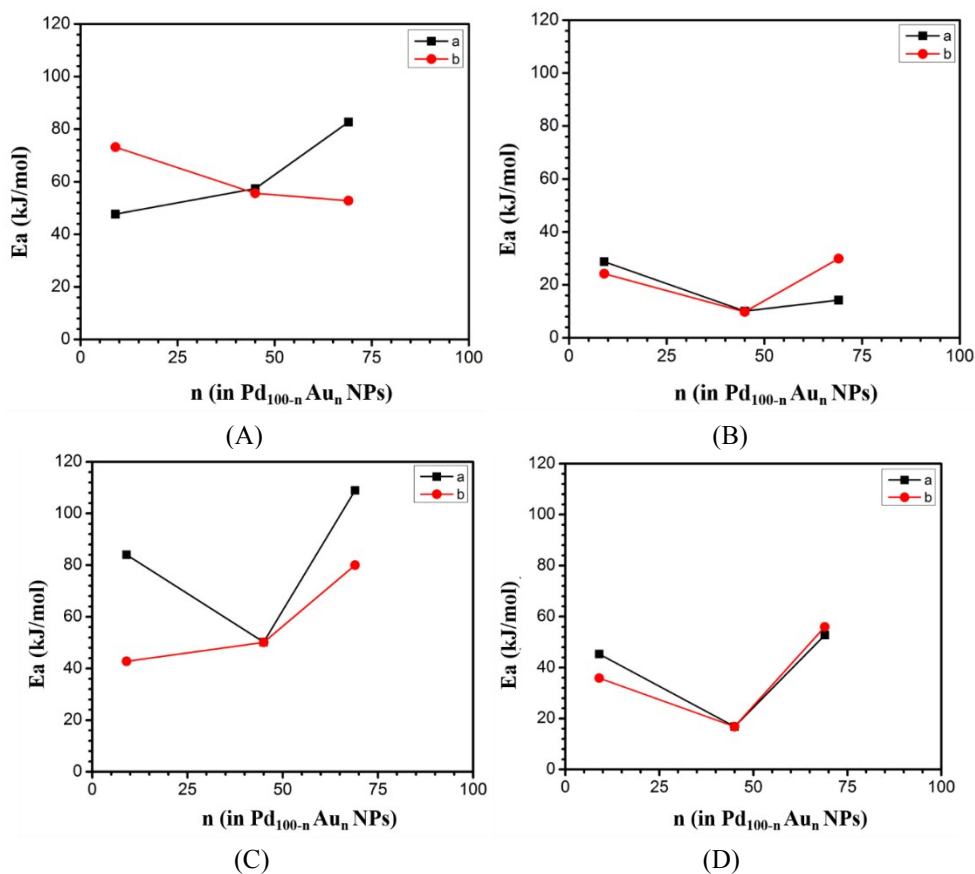

**Fig. S4** Activation energy ( $E_a$ ) vs. Au% ( $n$ ) in the low temperature (A-C) and the high temperature (B-D) ranges for propane oxidation over  $\text{Pd}_{100-n}\text{Au}_n/\text{TiO}_2$  (A-B) and over  $\text{Pd}_{100-n}\text{Au}_n/\text{Al}_2\text{O}_3$  (C-D) catalysts: freshly-prepared (a), and after  $\text{O}_2$  treatment (b).

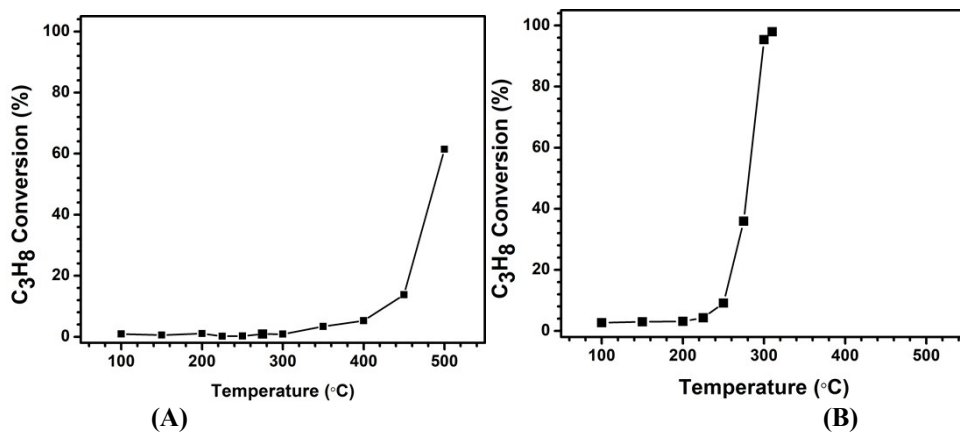

**Fig. S5.** Plots of propane oxidation activities over  $\text{Au}/\text{TiO}_2$  (A), and  $\text{Pd}/\text{Al}_2\text{O}_3$  (B).

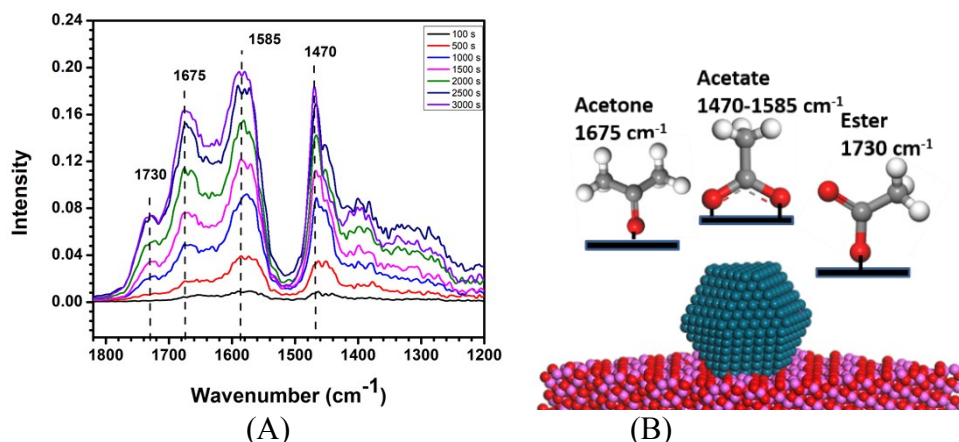

**Figure S6.** (A) In-situ DRIFTS spectra recorded during propane oxidation over Pd/Al<sub>2</sub>O<sub>3</sub> (commercial) at 275 °C; The spectra in the right are zoomed views of the spectra in the 1730 to 1330 cm<sup>-1</sup> region; and (B) Illustrations of in-situ DRIFTS study of intermediate species detection of propane oxidation over Pd/Al<sub>2</sub>O<sub>3</sub>. Pd (green), Au (yellow), C (gray), H (white), O (red), and Al (pink).

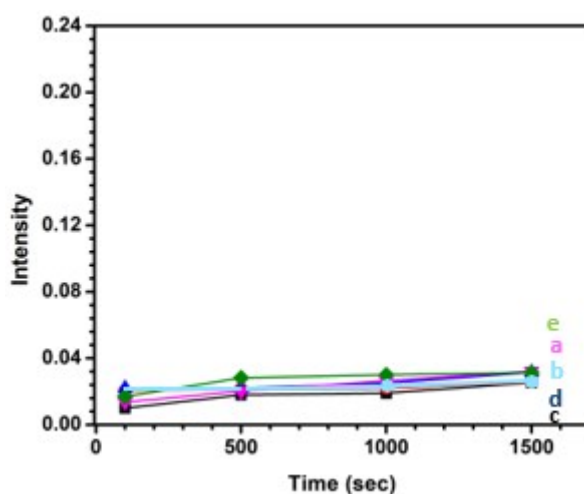

**Fig. S7.** Plots of peak intensity (peak height) vs time for propane oxidation adsorption at 350 °C for several major bands detected, including acetate  $\nu_{as}(\text{CH}_3\text{CO}_2^-)$  ~ 1560 cm<sup>-1</sup> (a, pink), acetone  $\nu(\text{CH}_3)_2\text{C}=\text{O}$  ~ 1681 cm<sup>-1</sup> (b, cyan), aliphatic ester  $\nu(\text{CH}_3\text{C}(\text{=O})-\text{O})$  ~ 1730 cm<sup>-1</sup> (c, black), bicarbonate  $\nu_{as}(\text{HOCO}_2^-)$  ~ 1644 cm<sup>-1</sup> (d, blue), formate  $\nu_{as}(\text{HCOO}^-)$  ~ 1593 cm<sup>-1</sup> (e, green), for Pd<sub>31</sub>Au<sub>69</sub>/Al<sub>2</sub>O<sub>3</sub> (C). The data are extracted from Figure 6.

**Table S1** Vibrational mode and position of intermediate species over catalyst surface in range (1200-3000 cm<sup>-1</sup>). Ref. 17

| Species         | Vibrational mode                           | Literature range (cm <sup>-1</sup> ) | This work (cm <sup>-1</sup> ) |
|-----------------|--------------------------------------------|--------------------------------------|-------------------------------|
| Acetate         | $\nu_{as}(\text{COO})$                     | 1550-1590                            | 1560-1580                     |
|                 | $\nu_s(\text{COO})$                        | 1458-1470                            | 1455-1460                     |
| Acetone         | $\nu(\text{C}=\text{O})$                   | 1668-1725                            | 1681-1683                     |
|                 | $\delta(\text{CH})$                        | 1434-1436                            | N/A                           |
| Aliphatic ester | $\nu(\text{C}=\text{O})$                   | 1720-1753                            | 1730-1733                     |
| Bicarbonate     | $\nu_{as}(\text{OCO})$                     | 1646-1653                            | 1645                          |
|                 | $\nu_s(\text{OCO})$                        | 1438-1451                            |                               |
| Enolate         | $\nu_{as}(\text{CH}_2=\text{CH}-\text{O})$ | 1633-1655                            |                               |

|                                       |                                                          |           |                  |
|---------------------------------------|----------------------------------------------------------|-----------|------------------|
|                                       | V <sub>s</sub> (CH <sub>2</sub> =CH-O)                   | 1392-1419 |                  |
|                                       | δ (CH)                                                   | 1335-1338 | 1373-1376        |
| Formate                               | V <sub>as</sub> (COO)                                    | 1586-1597 | 1593             |
|                                       | V <sub>s</sub> (OCO)                                     |           | N/A              |
|                                       | δ (C-H)                                                  |           | N/A              |
| Methoxy                               | δ <sub>as</sub> (CH <sub>2</sub> )                       | 1450-1475 | 1470, 1455, 1458 |
| Propionate                            | V <sub>as</sub> (COO)                                    | 1563-1568 |                  |
|                                       | V <sub>s</sub> (COO), δ <sub>as</sub> (CH <sub>3</sub> ) | 1470-1475 | N/A              |
|                                       | δ (CH <sub>2</sub> )                                     |           |                  |
| Water                                 | δ (HOH)                                                  | 1636-1646 | N/A              |
| Carbonate (monodentate)               | V <sub>as</sub> (COO)                                    |           | 1540-1542        |
|                                       | V <sub>s</sub> (OCO)                                     |           | N/A              |
|                                       | V (C-O)                                                  |           | N/A              |
| CO                                    | CO linear gaseous                                        |           | N/A              |
| CO <sub>2</sub>                       | gaseous                                                  |           | 2340-2360        |
| C <sub>3</sub> H <sub>8</sub> gaseous | C-H                                                      |           | 2968-2070        |
| Hydrocarbon fragments                 | CH <sub>2</sub> (ads) and CH <sub>3</sub> (ads)          |           | 2901-2902        |

**Table S2.** Summary of values of the apparent rate constant ( $k_1$  and  $k_2$ ) obtained from fitting curves in Figure 7. The

fitting was based on box lucas 2 model;  $\theta = \left( \frac{k_1}{k_1 - k_2} \right) * (\exp(k_2 * t) - \exp^{[70]}(-k_1 * t))$

| Catalysts                         | Surface species | $k_1$                  | $k_2$                 | $k_2/k_1$ |
|-----------------------------------|-----------------|------------------------|-----------------------|-----------|
| Pd <sub>9</sub> Au <sub>91</sub>  | ester           | 8.87x10 <sup>-5</sup>  | 6.07x10 <sup>-4</sup> | 6.84      |
|                                   | acetone         | 1.24 x10 <sup>-4</sup> | 6.69x10 <sup>-4</sup> | 5.39      |
|                                   | bicarbonate     | 2.22x10 <sup>-4</sup>  | 9.61x10 <sup>-4</sup> | 4.32      |
|                                   | acetate         | 1.29x10 <sup>-4</sup>  | 7.34x10 <sup>-4</sup> | 5.68      |
|                                   | formate         | 1.79x10 <sup>-4</sup>  | 7.18x10 <sup>-4</sup> | 4.011     |
| Pd <sub>55</sub> Au <sub>45</sub> | ester           | 1.37x10 <sup>-4</sup>  | 3.77x10 <sup>-4</sup> | 2.75      |
|                                   | acetone         | 1.56x10 <sup>-4</sup>  | 5.59x10 <sup>-4</sup> | 3.58      |
|                                   | bicarbonate     | 1.76x10 <sup>-4</sup>  | 6.54x10 <sup>-4</sup> | 3.71      |
|                                   | acetate         | 2.71x10 <sup>-4</sup>  | 6.87x10 <sup>-4</sup> | 2.53      |

**Table S3.** DFT-calculated adsorption energy for molecularly adsorbed propane, O<sub>2</sub>, acetate, and C-H on Pd<sub>n</sub>Au<sub>13-n</sub> clusters (n = 1, 6 and 9). Pd (green), Au (yellow), and O<sub>2</sub> (red)

|  | Pd <sub>13</sub> | Pd <sub>12</sub> Au <sub>1</sub> | Pd <sub>7</sub> Au <sub>6</sub> | Pd <sub>4</sub> Au <sub>9</sub> | Au <sub>13</sub> |
|--|------------------|----------------------------------|---------------------------------|---------------------------------|------------------|
|--|------------------|----------------------------------|---------------------------------|---------------------------------|------------------|

|                                     |                                                                                     |                                                                                     |                                                                                      |                                                                                       |                                                                                       |
|-------------------------------------|-------------------------------------------------------------------------------------|-------------------------------------------------------------------------------------|--------------------------------------------------------------------------------------|---------------------------------------------------------------------------------------|---------------------------------------------------------------------------------------|
| $\text{CH}_3\text{CH}_2\text{CH}_3$ | 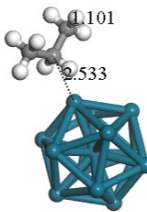   | 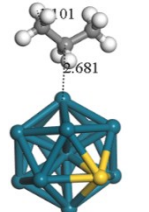   | 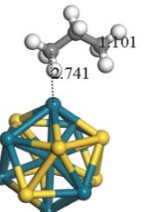   | 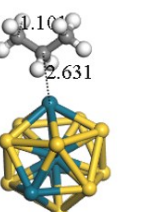   | 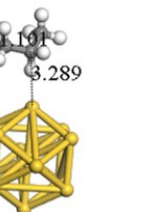   |
| Ads. energy (eV)                    | 0.19                                                                                | 0.21                                                                                | 0.27                                                                                 | 0.28                                                                                  | 0.12                                                                                  |
| $\text{O}_2$                        | 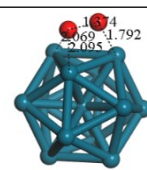   | 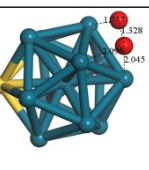   | 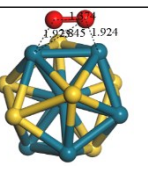   | 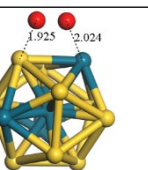   | 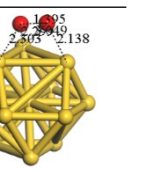   |
| Ads. energy (eV)                    | 1.53                                                                                | 1.46                                                                                | 1.19                                                                                 | 0.82                                                                                  | 0.41                                                                                  |
| $\text{CH}_3\text{COO}$             | 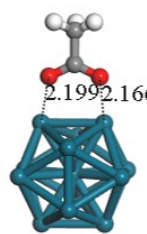   | 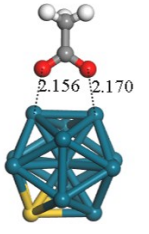   | 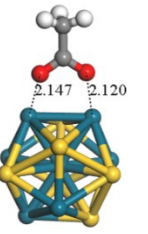   | 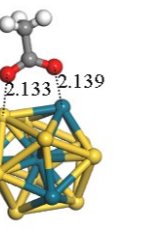   | distorted                                                                             |
| Ads. energy (eV)                    | 2.78                                                                                | 2.76                                                                                | 2.74                                                                                 | 2.79                                                                                  |                                                                                       |
| $\text{CH}_3\text{CH}_2\text{CH}_2$ | 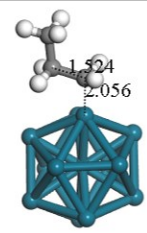  | 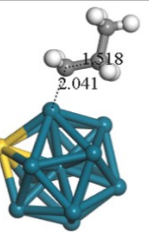  | 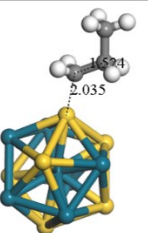  | 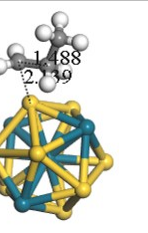  | 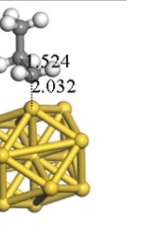  |
| Ads. energy (eV)                    | 1.88                                                                                | 1.89                                                                                | 1.78                                                                                 | 1.98                                                                                  | 1.87                                                                                  |
| $\text{CH}_3\text{CHCH}_3$          | 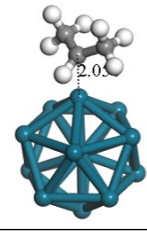 | 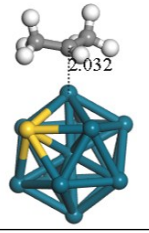 | 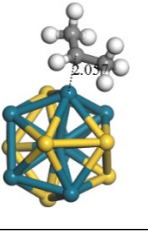 | 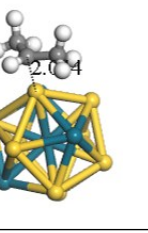 | 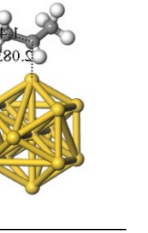 |
| Ads. energy (eV)                    | 1.76                                                                                | 1.78                                                                                | 1.7                                                                                  | 1.72                                                                                  | 1.7                                                                                   |

**Table S4** Structure, binding energy ( $E_{\text{binding}}$ ) and Pd-middle carbon distance for  $\text{Pd}_n\text{Au}_{13-n}$  clusters

| Composition                 | Cluster                                                                             | $E_{\text{binding}}$ (eV) | Pd-C distance (Å) |
|-----------------------------|-------------------------------------------------------------------------------------|---------------------------|-------------------|
| $\text{Pd}_{13}$            | 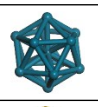 | 2.15                      | 2.64              |
| $\text{Pd}_{12}\text{Au}_1$ | 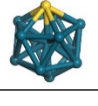 | 2.15                      | 2.27              |

|                          |                                                                                   |      |      |
|--------------------------|-----------------------------------------------------------------------------------|------|------|
| $\text{Pd}_7\text{Au}_6$ | 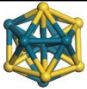 | 2.13 | 2.20 |
| $\text{Pd}_4\text{Au}_9$ | 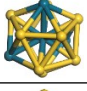 | 2.05 | 2.34 |
| $\text{Au}_{13}$         | 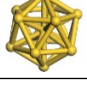 | 1.87 | 3.29 |
